# Supplementary material
Source: MDPI journal article supplement (https://www.mdpi.com/2076-328X/8/1/13)
Supplement: s1 [file s1]

Archive with 3 entries (3 files):
- behavsci-234611-Rely to Reviewer 2.pdf
- behavsci-234611-Reply to Reviewer 3.pdf
- review report 234611.docx
