# Supplementary material
Source: MDPI journal article supplement (https://www.mdpi.com/2076-328X/8/1/13)
Supplement: s1 [file s1 › review report 234611.docx]

Reviewer 1:

Comments:

This a broad reveiw which will interest those new to the field. As far as I can tell all the information is accurate and uptodate and not controversial.  The prose is clear and with very minor excpetions the English is good.

Authors’ reply:

Thank you for your review of our work, please see attached our reply.

Reviewer 2

First round

Comments:

This paper represents a nice idea, since the issue of the social regulation of domesticated Jungle fowls is highly captivating. More importantly, the resulting reflections in terms of minimising psychophysical suffering under cage constraints is definitely an important one.

However the paper has a minimal bibliography and most of the concepts are only touched upon. Overall, the paper should enlarge the text of 25-30 % of its present length.

Specific points:

Lines 23-24 even earlier: such a genetic  ancestry, yet putative, deserves an entire paragraph.

46-52: the massive literature on fowls social hierarchies, pecking order etc deserves at least a couple of paragraphs.

63-66 :sexual behaviour and especially cognition need further elucidation ( about 3 para)

91-96: bird olfaction, Floriano Papi’s pioneering studies on homing pigeon navigation neeed to be cited, with other authors, F. Bonadonna, seabirds, Annina Gagliardo, etc.

110-120: the impact on welfare is only mentioned; indeed, it represents a core issue of the present paper.

119-120: in particular, male intraspecific aggressions are of paramount importance in terms of managing social settings. An entire para should be devoted to them and how to cope with escalation leading to injuries.

146-156: how selection for domestication more precisely molded sensory “gates” in this strains? Clarify.169-175: affective state. This is an original perspective, in need of further details and operative refletcions for managing.

 184- : fowl personality. Operational indications for keepers should be made by adding more space to them; as in the case of suine subjects (see papers by Francoise Wemensfelder, Edinburgh) animal personalities may in fact conflict with human personalities.

 378-389: conlusions. They are definitely very, very poor statements.

Authors’ reply

Thank you for your effort spent on reading and reviewing our manuscript. We have replied to your comments below, in Calibri, bold text.

To clarify, the manuscript was originally written as part of a special issue focusing on animal welfare and ethics, but has now been moved to become a regular submission. Because of this we have, overall, toned down our focus on welfare. Instead the main focus of the paper is to discuss behaviour and cognition, with the impacts of these topics on welfare being more of a side topic. When discussing welfare, we mean welfare for all kept fowl, not necessarily poultry industry specifically (although, this is of course very relevant). Consequently, some of the Reviewer’s comments are no longer relevant. We hope this is clear in our point to point reply below and when reading our revised version.

Line numbers refers to the numbers of the revised manuscript, i.e. the manuscript with track changes still intact.

Best wishes,

Hanne Lovlie, Laura Garnham

Because the manuscript is not an experimental study, we feel that several of the ‘must be improved’ ticked boxed above are hard to improve, and are not very relevant for our submitted work. If the Editor is not satisfied with our revision in terms of the above comments, please advise us on how to improve this to satisfaction.

Comments and Suggestions for Authors This paper represents a nice idea, since the issue of the social regulation of domesticated Jungle fowls is highly captivating. More importantly, the resulting reflections in terms of minimising psychophysical suffering under cage constraints is definitely an important one. Thank you for seeing value in our work and being positive in terms of the need for an overview as we here present as we too share this view.

However the paper has a minimal bibliography and most of the concepts are only touched upon. Overall, the paper should enlarge the text of 25-30 % of its present length.

As suggested by both Reviewer 2 and Reviewer 3, we have expanded the already quite extensive literature cited further in the current version of the manuscript (now 144 references). However, because there have been several recent thorough and excellent reviews and even books on the topic, we have not reviewed these topics in detail again.

We have aimed to make this clearer in the revised version of the manuscript.

Specific points

Lines 23-24 even earlier: such a genetic ancestry, yet putative, deserves an entire paragraph. We followed the suggestion of the reviewer and have extended the paragraph on the ancestry of the domestic chicken (now lines 27-32) to include more information on its genetic ancestry.

46-52: the massive literature on fowls social hierarchies, pecking order etc deserves at least a couple of paragraphs.

We have followed the suggestion of the reviewer extended the section on social

dominance and social behaviour (lines 160-199). We feel further extension is not needed due to the recent extensive reviews on the topic by e.g. Pizzari 2016, Nicol 2015.

63-66 :sexual behaviour and especially cognition need further elucidation ( about 3 para)

We have followed the recommendation by the Reviewer and have added more

information on sexual behaviour (lines 191-255) in the revised version of the manuscript.

We have also extended the cognition section by including information on several aspects of cognition as was requested by Reviewer 3 (lines 339-599). We hope these extensions are to the Reviewer’s satisfaction. We would like to remind of the several, recent reviews on these topics and that we have clarified in the current version of the manuscript that we do not intend to review these reviews in detail, but aim to expand on these. 91-96: bird olfaction, Floriano Papi’s pioneering studies on homing pigeon navigation neeed to be cited, with other authors, F. Bonadonna, seabirds, Annina Gagliardo, etc.

The Reviewer is correct in that there is a growing number of studies demonstrating that avian olfaction is not as poor as traditionally assumed. While the manuscript specifically focuses on fowl, we have chosen to not expand on avian olfaction here, but instead have included a reference to review on avian olfaction that discusses olfaction in a number of species, including pigeons and sea birds (line 117).

110-120: the impact on welfare is only mentioned; indeed, it represents a core issue of the present paper.

As mentioned in the beginning of our reply to the comments of Reviewer 2, welfare is no longer the core issue of this manuscript. We have however slightly increase the focus on welfare in the section on social behaviour, which is the section the Reviewer here refers to, accommodate the request by Reviewer 2.

119-120: in particular, male intraspecific aggressions are of paramount importance in terms of managing social settings. An entire para should be devoted to them and how to cope with escalation leading to injuries.

Thank you for your suggestion. Intra-sexual selection is of seminal importance for both male and female fowl, and aggression is an important part of this. However, as sex ratios are typically heavily female biased in industrial settings, we have decided to focus our discussion of welfare and social behaviour more on the issues of sexual harassment of females by males (e.g. lines 268-280), and reducing/limiting aggression in general (lines 324-336). The latter could include male intraspecific interactions but is not focused on this specifically. We have however overall added further literature on male aggression, with the aim to accommodate the comments by Reviewer 2. 146-156: how selection for domestication more precisely molded sensory “gates” in this strains? Clarify.

Our apologies, but we are not able to find what the Reviewer is referring to here, in the previous version of the manuscript. We hope however that with the revisions made, that this point has become clearer. 169-175: affective state. This is an original perspective, in need of further details and operative refletcions for managing.

Thank you. We have now created a full section focusing on affective state itself (which was also suggested by Reviewer 3) and have increased the focus on welfare within this section (lines 339-377). 184- : fowl personality. Operational indications for keepers should be made by adding more space to them; as in the case of suine subjects (see papers by Francoise Wemensfelder, Edinburgh) animal personalities may in fact conflict with human personalities.

Thank you for the suggested literature, this is indeed an interesting idea, however

Wemensfelder’s work does not focus on fowl. We aim in the submitted work to specifically focus on the fowl. Therefore, we have chosen not to include this as we feel that including work on the personality of other animals and humans is going outside the aim of the current work. We hope this is clear in the revised version. 378-389: conlusions. They are definitely very, very poor statements.

We agree with the reviewer that the previous conclusions were not well aligned with the intended aim of the manuscript. We hope that with the clarified aims, the conclusions of our work are better matching (lines 669-695).

Submission Date: 01 October 2017, Date of this review: 27 Nov 2017 14:55:15

Second round

Commets:

THIS REVISED VERSION IS OK NOW.

Reviewer 3

First round

Comments

This manuscript provides an overview on complex behaviour and cognition in the fowl. The aim of this review is an important one, i.e. to increase the readers' awareness and consideration of the fowl by bringing to attention the huge set of experimental results obtained about this species in the last 30-40 years. This is particularly relevant when considering that the fowl is the most abundant production animal, a species subject to intensive farming and - too often - to poor welfare conditions.

The manuscript is well written (I detected only some minor text editing issues, e.g. line 161 "se" instead of "see"; line 337 understanding "of" the sensory....; line 369 "not depend not") and the evidence reported is correctly and clearly described, although often quite superficially, especially for what concerns the section on sensory ability and on cognition.

My main concern regards the fact that this review in its current state is too similar in structure and content to the recent review published on the same topic by Lori Marino (Animal Cognition, 2017). If a reader has already had the chance to read the Marino's article, he/she would find this reading pretty much of a duplicate. Moreover some of the issues - as mentioned above - are tackled at a more superficial-generic level. The part on sensory abilities is too similar to Marino's paper and it is disappointingly succinte, same holds true for the section on complex cognition. There are notable exceptions though: the parts dealing with sexual selection, personality, and welfare implications.

I therefore reccommend the authors to revise this article and extending those parts by providing more detailed information, and in general to allocate much more attention to the most recent literature, which is not present in Marino's paper.

The domestic chicken has been extensively studied also with regard to topics which are not at all considered in the present paper (nor are they mentioned in Marino's review) such as brain lateralisation, face perception (starting from Morton and Johnson's seminal paper) and the neurobiology of learning and memory (investigating mechanisms of learning such as filial imprinting or passive avoidance). These are just some suggestions for the authors in order to enrich and individuate their paper by broadening sections which do not overlap with the existing general review literature.

Other issues:

Much of the discussion on cognitive abilities (pages 6 and 7) is actually dealing with affective and emotional behaviour rather than proper cognition. I wonder if it would be worth to have a separate section dealing with those issues.

Also, please check the referencing throughout as it seems that there are some mis-quotations (e.g. line 311 ref. 94, and possibly others). References number 73 and 104 are incomplete.

When discussing the implications for welfare, please provide evidence-based advise, or, if claims are not evidence-based this should be clearly stated (e.g. lines 341-42 about artificial light; or lines 351-353 on social learning of feather pecking).

Concerning welfare implications, maybe some information on the actual legislation and on its historical evolution to accomodate scientific evidence on chickens' behaviour would be of some interest to the readers.

line 305: I believe "perceptually filling in" is more correct than the current expression "mentally filling in".

Author’s reply

Authors’ reply to the review of Reviewer 3

Thank you for your effort spent on reviewing and commenting our manuscript. We have replied to your comments below, in Calibri, bold face text. Overall, we have followed your recommendations and we have added more information to the section on cognition, created a separate section for affective state and aimed to make the structure more unique. The previous similarity in structure with the paper by Marino 2016 was purely accidental and not at all intentional, as we have had several different structures of our paper throughout. The similarity in starting with reviewing sensory abilities makes logical sense and is intuitive to have prior to other aspects, thus we have kept this structure. Other aspects should now not be similar, whenever not intuitive to follow similar structure. We hope that this has improved in the revised manuscript. Line numbers stated refers to the numbers of the revised manuscript, i.e. the manuscript with track changes still intact.

Best wishes,

Hanne Lovlie, Laura Garnham

This manuscript provides an overview on complex behaviour and cognition in the fowl. The aim of this review is an important one, i.e. to increase the readers' awareness and consideration of the fowl by bringing to attention the huge set of experimental results obtained about this species in the last 30-40 years. This is particularly relevant when considering that the fowl is the most abundant production animal, a species subject to intensive farming and - too often - to poor welfare conditions.

We are pleased to see that the reviewer shares our interest for the topic and supports our view on the need for a review of it.

The manuscript is well written (I detected only some minor text editing issues, e.g. line 161 "se" instead of "see"; line 337 understanding "of" the sensory....; line 369 "not depend not") and the evidence reported is correctly and clearly described, although often quite superficially, especially for what concerns the section on sensory ability and on cognition.

Thank you. We are pleased to hear that you find our text clearly written. Regarding the spelling mistakes, these have now been amended. We did however keep ‘per se’ as this is Latin (i.e. not English). We agree with you that some sections are not going into details and

have aimed to add more detail to several of these, however, we do not aim to review again what has been well reviewed by the recent reviews (mainly Nicol 2015, Pizzari 2016, Marino 2016) and hope this has become clearer in the revised version of the manuscript.

My main concern regards the fact that this review in its current state is too similar in structure and content to the recent review published on the same topic by Lori Marino (Animal Cognition, 2017). If a reader has already had the chance to read the Marino's article, he/she would find this reading pretty much of a duplicate. Moreover some of the issues - as mentioned above - are tackled at a more superficial-generic level. The part on sensory abilities is too similar to Marino's paper and it is disappointingly succinte, same holds true for the section on complex cognition. There are notable exceptions though: the parts dealing with sexual selection, personality, and welfare implications.

I therefore reccommend the authors to revise this article and extending those parts by providing more detailed information, and in general to allocate much more attention to the most recent literature, which is not present in Marino's paper.

Thank you for your comments and advise on how to expand our work. Our overview is to a large extent based on Nicol (2015), Pizzari (2016) and Marino (2016). The similarity in structure to Marino was not intended or in any way copied, as we have had various suggested structures while drafting this manuscript. The presentation of senses prior to cognitive abilities does make intuitive sense, and we have thus kept this. To present visual senses first again make intuitive sense due to it being the seemingly primary sense of the fowl. We have therefore felt obliged to keep this similarity in structure to prior work (it does have similar structure to also Nicol’s book in this aspect, due to its intuitive sense).

The structure has however been changed for the current version of the paper and more detail added to the sections on sensory ability and cognition. The extension on sensory biology is less so compared to cognition, since sensory biology was not the main aim of our overview and merely need to be reviewed to better understand the complex behaviour and cognition of the fowl. We have also included information from more recent publications to bring the manuscript more up to date, as suggested by the Reviewer.

The domestic chicken has been extensively studied also with regard to topics which are not at all considered in the present paper (nor are they mentioned in Marino's review) such as brain lateralisation, face perception (starting from Morton and Johnson's seminal paper) and the neurobiology of learning and memory (investigating mechanisms of learning such as filial imprinting or passive avoidance). These are just some suggestions for the authors in order to enrich and individuate their paper by broadening sections which do not overlap with the existing general review literature.

We again appreciate the effort by the Reviewer to improve our work and thank the

Reviewer for these suggestions. We have followed the suggestions by the reviewer and have now included information on facial recognition, imprinting, passive avoidance learning, brain lateralisation, and declarative memory and added more detail to the cognition section overall (lines 379-598).

Other issues:

Much of the discussion on cognitive abilities (pages 6 and 7) is actually dealing with affective and emotional behaviour rather than proper cognition. I wonder if it would be worth to have a separate section dealing with those issues.

We agree and following the suggestion of the Reviewer, the information on affective state can now be found in a separate section (lines 339-376).

Also, please check the referencing throughout as it seems that there are some mis-quotations (e.g. line 311 ref. 94, and possibly others). References number 73 and 104 are incomplete. Thank you. The Reviewer is correct, there were mistakes in the references of the previous

version of the manuscript. We have aimed to carefully double checked our references in the revised version of the manuscript.

When discussing the implications for welfare, please provide evidence-based advise, or, if claims are not evidence-based this should be clearly stated (e.g. lines 341-42 about artificial light; or lines 351353 on social learning of feather pecking).

In the revised version of the manuscript, the text has now been gone through and, for any discussion of welfare implications, we have aimed to be clearer in whether the advice is evidence based or not.

Concerning welfare implications, maybe some information on the actual legislation and on its historical evolution to accomodate scientific evidence on chickens' behaviour would be of some interest to the readers.

We agree that this may be interest to some readers, thank you for the suggestion.

However, our paper has moved from being intended to be part of a special issue on welfare and cognition, to a general submission. As a result of this, our aims have changed slightly (lines 79-92) and we have now toned down our focus on welfare. Therefore, we feel that discussing legislation and evolution of welfare would fall outside of the current scope. line 305: I believe "perceptually filling in" is more correct than the current expression "mentally filling in".

Thank you, this has been amended.

Second round

Comments
I appreciated the changes made by the Authors in their revised version. The new version is in my opinion much improved and suitable for publication in its present form.
